# Supplementary material for: Comprehensive Analysis of Copy Number Variation, Nucleotide Mutation, and Transcription Level of PPAR Pathway-Related Genes in Endometrial Cancer
Source: Hindawi journal article supplement (doi:10.1155/2022/5572258), 2022-01-13
Supplement: f1 [file 5572258.f1.pdf]

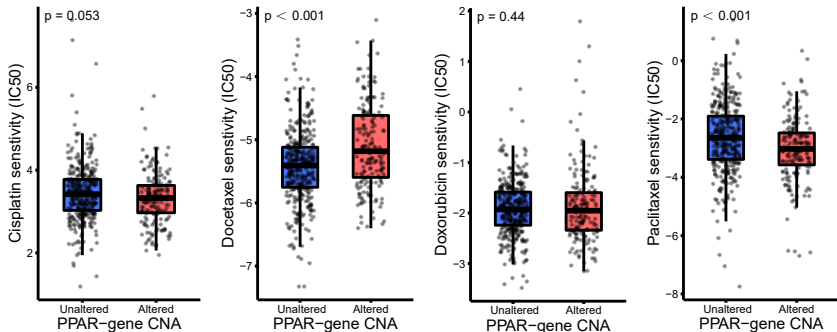

(a)

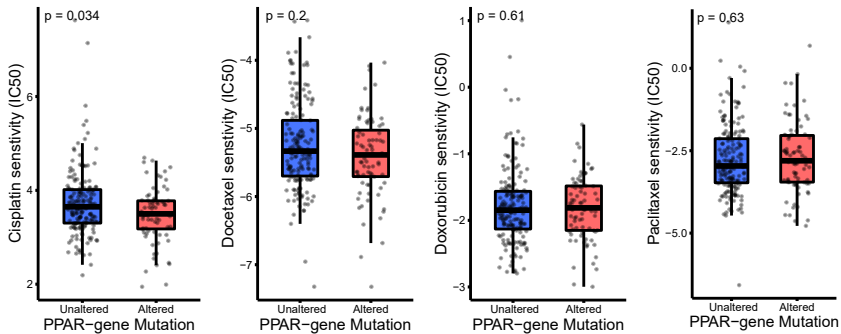

(b)
