# Supplementary material for: Comprehensive Analysis of Copy Number Variation, Nucleotide Mutation, and Transcription Level of PPAR Pathway-Related Genes in Endometrial Cancer
Source: Hindawi journal article supplement (doi:10.1155/2022/5572258), 2022-01-13

# CPTAC-UCEC PPAR-gene

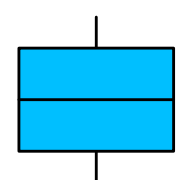

Normal

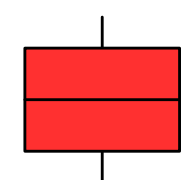

Endometrioid

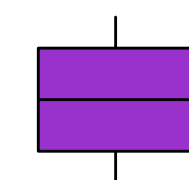

Serous

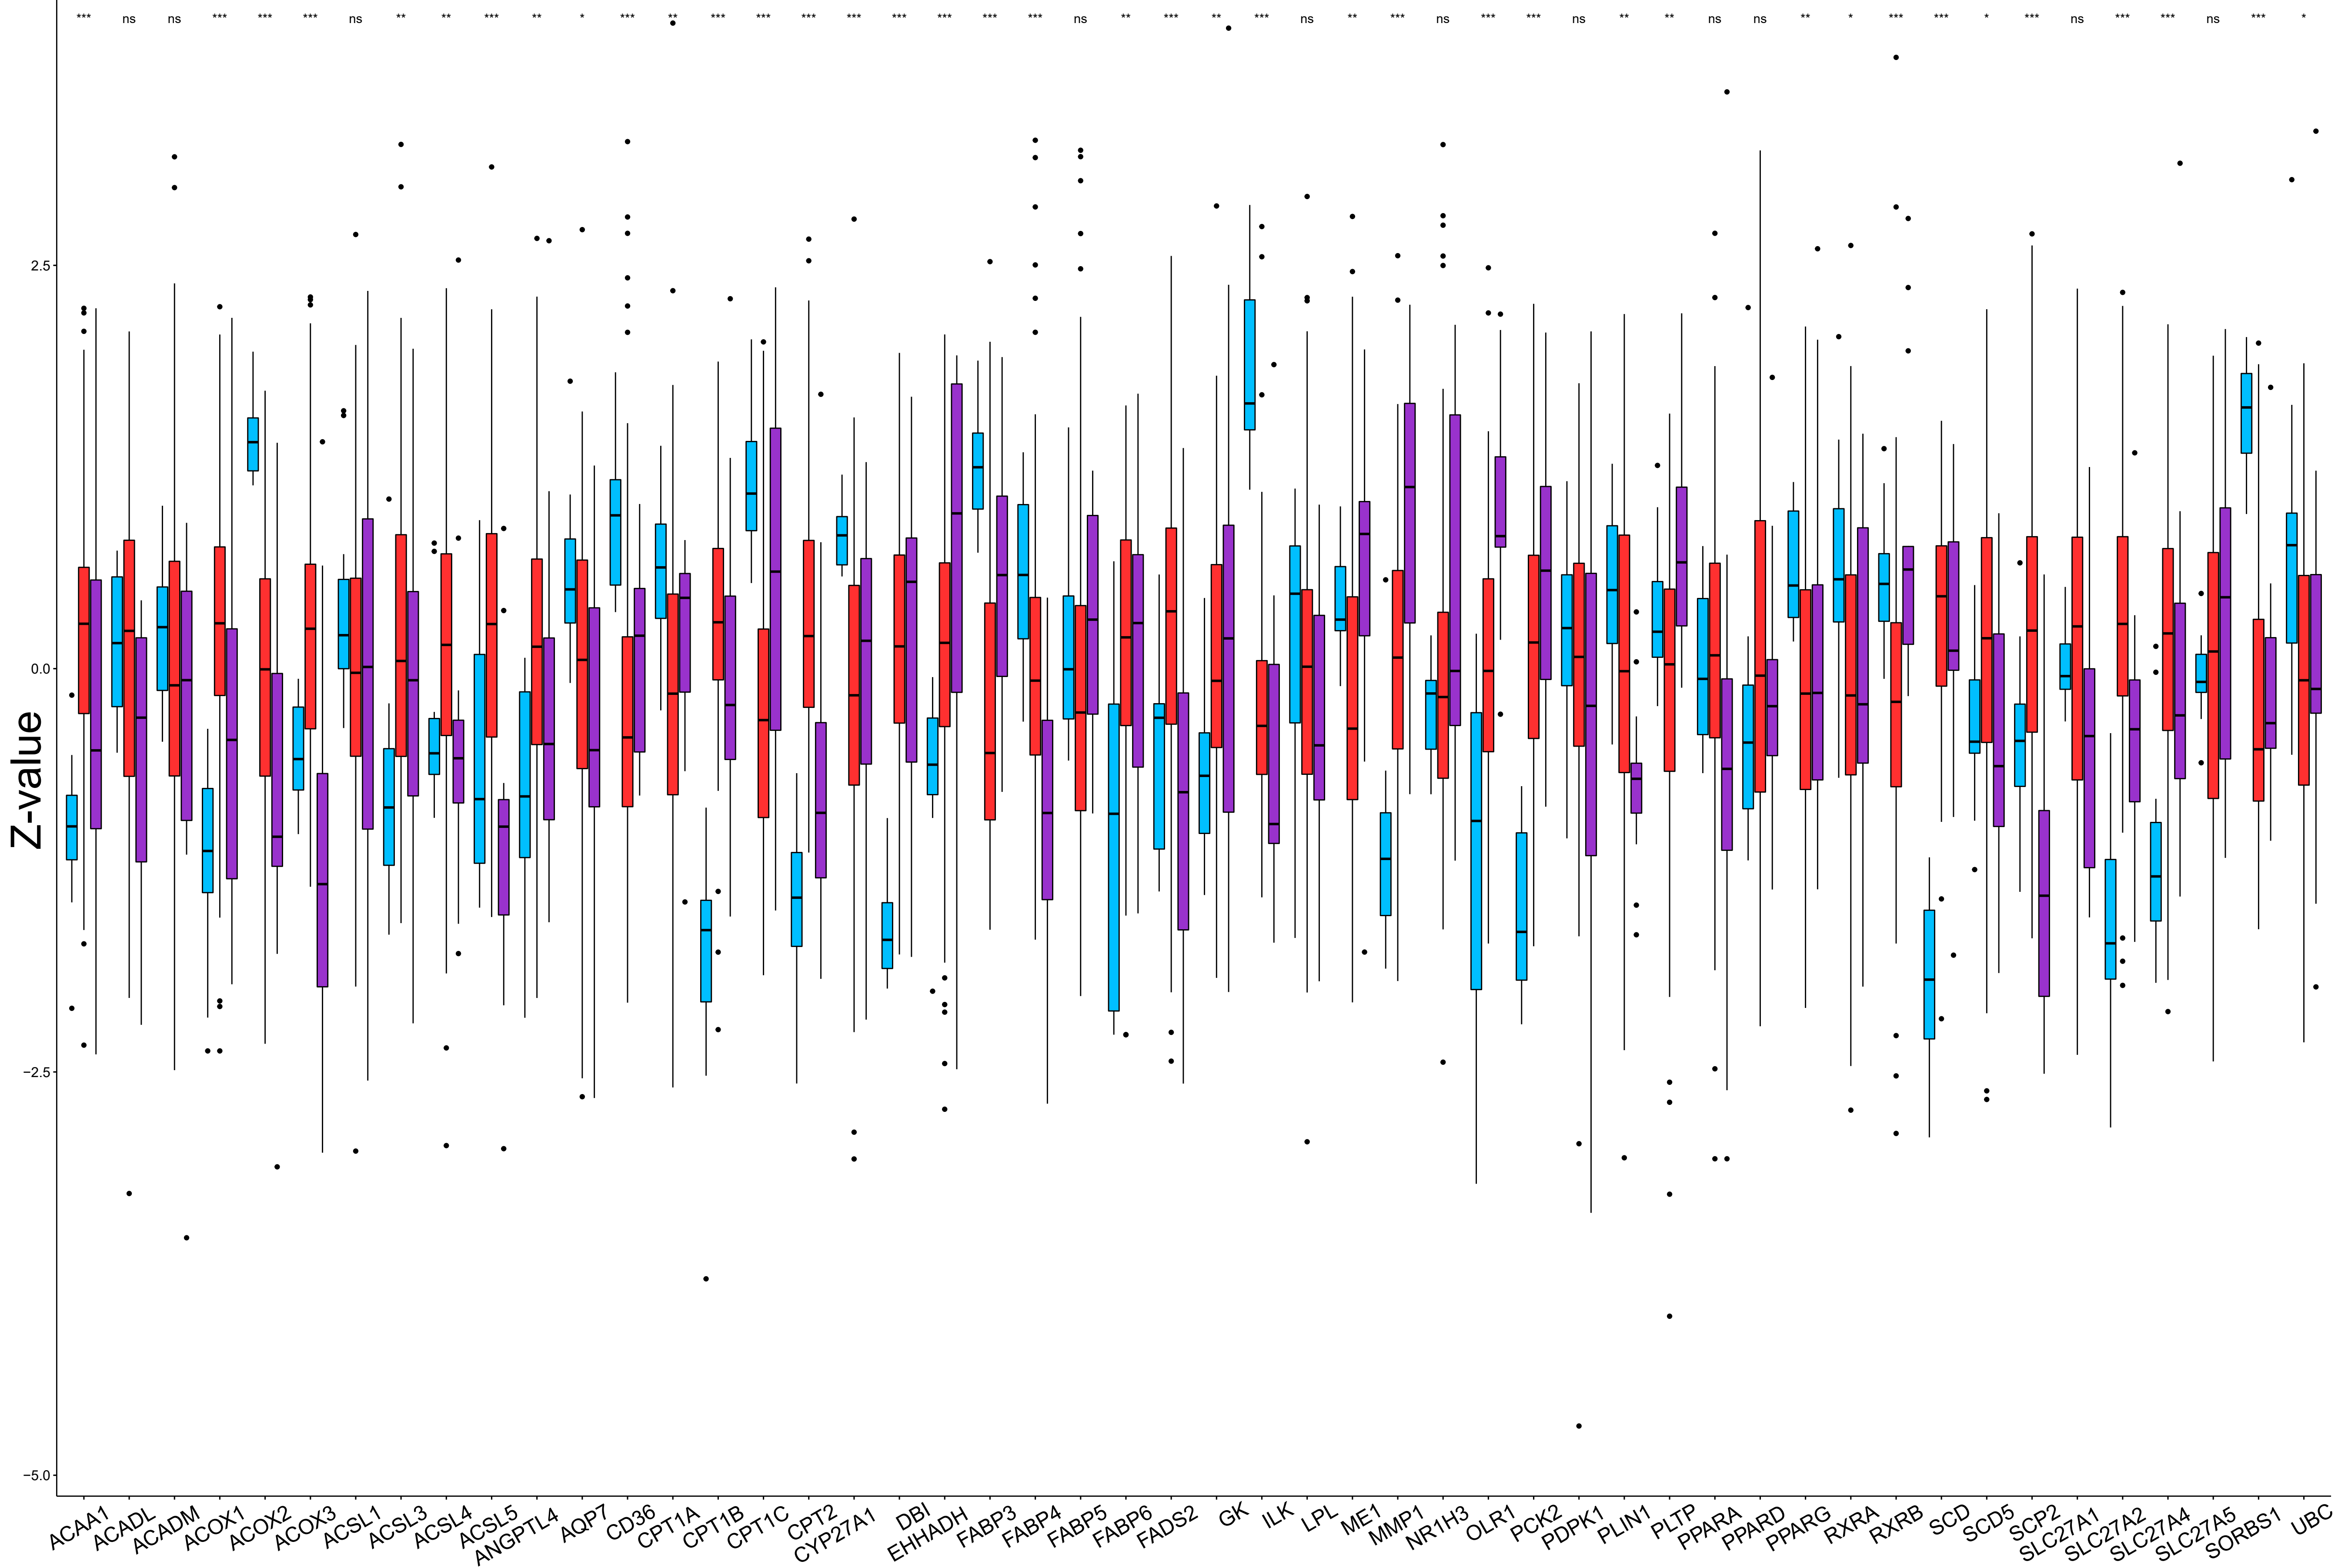

Supplement: f2 [file 5572258.f2.pdf]
